# Supplementary material
Source: publisher figshare collection journal article supplement (https://tandf.figshare.com/ndownloader/files/15604094)
Supplement: Supplementary file 1 [file 15604094]

## Appendix A. Item sets for experiments

### Wh-Filler-Gap Dependency in Coordinated Structures (*Experiments 1a & 1b*)

Condition a: Plural local noun, Grammatical

Condition b: Plural local noun, Ungrammatical

Condition c: Singular local noun, Grammatical

Condition d: Singular local noun, Ungrammatical

An example of a full set of Experiment 1:

- 1      a.      Derek revealed which key to the **cells** can be used for front doors and unsurprisingly **is** used for two doors.  
      b.      Derek revealed which key to the **cells** can be used for front doors and unsurprisingly **are** used for two doors.  
      c.      Derek revealed which key to the **cell** can be used for front doors and unsurprisingly **is** used for two doors.  
      d.      Derek revealed which key to the **cell** can be used for front doors and unsurprisingly **are** used for two doors.
- 2      a-d.    Jeremy wonders which name on the billboard(s) must be repainted before the weekend, and probably is/are almost completely faded away.
- 3      a-d.    Lydia explains which citation on the notecard(s) might be quite difficult to follow, and unfortunately is/are very hard to understand.
- 4      a-d.    Albert guesses which memo from the supervisor(s) should be about the tax return, and unfortunately is/are about next week's agenda.
- 5      a-d.    Cindy discloses which path to the monument(s) must be covered with pretty flowers, and currently is/are lined with lovely trees.
- 6      a-d.    Sandy discloses which boat to the island(s) can be found on the shore, and possibly is/are docked on the lake.
- 7      a-d.    Maria explains which flaw in the argument(s) will be very obvious to everyone, and usually is/are difficult to properly reconcile.
- 8      a-d.    Caitlin ponders which door to the laborator(ies) must be left unlocked at lunch, and definitely is/are locked up after nine.
- 9      a-d.    Tiffany discloses which gift for the visitor(s) must be bought from the store, and apparently is/are very expensive to buy.
- 10     a-d.    William discloses which message for the engineer(s) should be available to his peers, and fortunately is/are very easy to access.
- 11     a-d.    David explains which picture on the flier(s) should be of a rural area, and definitely is/are of a village church.
- 12     a-d.    The slogan on the poster(s) should be designed to get attention and unsurprisingly is/are now boring to enjoy.
- 13     a-d.    Seth guesses which issue with the appliance(s) must be solved by the company, and probably is/are reviewed by the CEO.
- 14     a-d.    Bradley remembered which telescope for the experiment(s) should be stored in the lab, and always is/are protected in the office.
15.    a-d     Sue checks which rose in the garden(s) should be growing in the spring, and usually is/are wilting before the summer.
- 16     a-d.    Tina guesses which letter from the investigator(s) should be received in late April, and allegedly is/are being sent in March.

- 17 a-d. Terry reveals which crime in the suburb(s) must be a reflection of violence, and ultimately is/are a demonstration of protest.
- 18 a-d. Nick reveals which poster of the band(s) must be prominent on the wall, and typically is/are noticeable in the background.
- 19 a-d. Wendy ponders which statue of the bird(s) will be lovely in the backyard, and currently is/are pretty in the garden.
- 20 a-d. Shelby ponders which ring with the diamond(s) can be hidden in the closet, and evidently is/are in the jewelry box.
- 21 a-d. Ethan explains which informant in the camp(s) must be passing information to enemies, and regrettably is/are suspected of sending secrets.
- 22 a-d. Kathleen ponders which entrance to the exhibit(s) can be very hard to find, and similarly is/are too dark to see.
- 23 a-d. Kelly reveals which teapot for the part(ies) should be cleaned by the maid, and undoubtedly is/are dirty in the sink.
- 24 a-d. Sue reveals which check from the stockbroker(s) can be invested in good stock, and usually is/are cashed at the bank.
- 25 a-d. Molly remembers which gate to the pasture(s) must be leading to the campus, and evidently is/are across from the park.
- 26 a-d. Andrew explains which anchor with the rope(s) will be left outside the boat, and likely is/are left beside the dock.
- 27 a-d. Martin remembers which advertisement on the skyscrapers could be difficult to read clearly, and typically is/are too hard to read.
- 28 a-d. Bianca explains which trail for the hike(s) will be disgusting after the storm, and always is/are busy during the summer.
- 29 a-d. Derek recalls which mistake in the program(s) will be disastrous for the company, and certainly is/are harmful for everyone involved.
- 30 a-d. Rachel recalls which copy of the memo(s) must be important in the case, and typically is/are helpful to the lawyer.
- 31 a-d. Ruth recalls which basket for the pastr(ies) should be greasy from the chips, and usually is/are sticky from the doughnuts.
- 32 a-d. Walter recalls which label on the container(s) will be uninformative about the chemicals, and likely is/are lacking the appropriate warning.

### **Wh-filler vs. The Definite NP (*Experiments 2a & 2b*)**

Condition a: Singular local noun, Grammatical, The Definite NP

Condition b: Singular local noun, Ungrammatical, The Definite NP

Condition c: Plural local noun, Grammatical, The Definite NP

Condition d: Plural local noun, Ungrammatical, The Definite NP

Condition e: Singular local noun, Grammatical, Wh-Filler

Condition f: Singular local noun, Grammatical, Wh-Filler

Condition g: Plural local noun, Grammatical, Wh-Filler

Condition h: Plural local noun, Grammatical, Wh-Filler

An example of a full set of Experiment 2:

- 1 a. The key to the cell can be used for front doors and unsurprisingly is used for two doors.
- b. The key to the cell can be used for front doors and unsurprisingly are used for two doors.

- c. The key to the cells can be used for front doors and unsurprisingly is used for two doors.
  - d. The key to the cells can be used for front doors and unsurprisingly are used for two doors.
  - e. Which key to the cell can be used for front doors and unsurprisingly is used for two doors?
  - f. Which key to the cell can be used for front doors and unsurprisingly are used for two doors?
  - g. Which key to the cells can be used for front doors and unsurprisingly is used for two doors?
  - h. Which key to the cells can be used for front doors and unsurprisingly are used for two doors?
- 2
- a-d. The name on the billboard(s) must be repainted before the weekend and probably is/are almost completely faded away.
  - e-h. Which name on the billboard(s) must be repainted before the weekend and probably is/are almost completely faded away?
- 3
- a-d. The citation on the notecard(s) might be quite difficult to follow and unfortunately is/are very hard to understand.
  - e-h. Which citation on the notecard(s) might be quite difficult to follow and unfortunately is/are very hard to understand?
- 4
- a-d. The memo from the supervisor(s) should be about the tax return and unfortunately is/are about next week's agenda.
  - e-h. Which memo from the supervisor(s) should be about the tax return and unfortunately is/are about next week's agenda?
- 5
- a-d. The path to the monument(s) must be covered with pretty flowers and currently is/are lined with lovely trees.
  - e-h. Which path to the monument(s) must be covered with pretty flowers and currently is/are lined with lovely trees?
- 6
- a-d. The boat to the island(s) can be found on the shore and possibly is/are docked on the lake.
  - e-h. Which boat to the island(s) can be found on the shore and possibly is/are docked on the lake?
- 7
- a-d. The flaw in the argument(s) will be very obvious to everyone and usually is/are difficult to properly reconcile.
  - e-h. Which flaw in the argument(s) will be very obvious to everyone and usually is/are difficult to properly reconcile?
- 8
- a-d. The door to the laborator(ies) must be left unlocked at lunch and definitely is/are locked up after nine.
  - e-h. Which door to the laborator(ies) must be left unlocked at lunch and definitely is/are locked up after nine?
- 9
- a-d. The gift for the visitor(s) must be bought from the store and apparently is/are very expensive to buy.
  - e-h. Which gift for the visitor(s) must be bought from the store and apparently is/are very expensive to buy?
- 10
- a-d. The message for the engineer(s) should be available to his peers and fortunately is/are very easy to access.
  - e-h. Which message for the engineer(s) should be available to his peers and fortunately is/are very easy to access?
- 11
- a-d. The picture on the flier(s) should be of a rural area and definitely is/are of a village church.
  - e-h. Which picture on the flier(s) should be of a rural area and definitely is/are of a village church?
- 12
- a-d. The slogan on the poster(s) should be designed to get attention and unsurprisingly

- is/are now boring to enjoy.
- e-h. Which slogan on the poster(s) should be designed to get attention and unsurprisingly is/are now boring to enjoy?
- 13 a-d. The issue with the appliance(s) must be solved by the company and probably is/are reviewed by the CEO.
- e-h. Which issue with the appliance(s) must be solved by the company and probably is/are reviewed by the CEO?
- 14 a-d. The telescope for the experiment(s) should be stored in the lab and always is/are protected in the office.
- e-h. Which telescope for the experiment(s) should be stored in the lab and always is/are protected in the office?
- 15 a-d. The rose in the garden(s) should be growing in the spring and usually is/are wilting before the summer.
- e-h. Which rose in the garden(s) should be growing in the spring and usually is/are wilting before the summer?
- 16 a-d. The letter from the investigator(s) should be received in late April and allegedly is/are being sent in March.
- e-h. Which letter from the investigator(s) should be received in late April and allegedly is/are being sent in March?
- 17 a-d. The crime in the suburb(s) must be a reflection of violence and ultimately is/are a demonstration of protest.
- e-h. Which crime in the suburb(s) must be a reflection of violence and ultimately is/are a demonstration of protest?
- 18 a-d. The poster of the band(s) must be prominent on the wall and typically is/are noticeable in the background.
- e-h. Which poster of the band(s) must be prominent on the wall and typically is/are noticeable in the background?
- 19 a-d. The statue of the bird(s) will be lovely in the backyard and currently is/are pretty in the garden.
- e-h. Which statue of the bird(s) will be lovely in the backyard and currently is/are pretty in the garden?
- 20 a-d. The ring with the diamond(s) can be hidden in the closet and evidently is/are in the jewelry box.
- e-h. Which ring with the diamond(s) can be hidden in the closet and evidently is/are in the jewelry box?
- 21 a-d. The informant in the camp(s) must be passing information to enemies and regrettably is/are suspected of sending secrets.
- e-h. Which informant in the camp(s) must be passing information to enemies and regrettably is/are suspected of sending secrets?
- 22 a-d. The entrance to the exhibit(s) can be very hard to find and similarly is/are too dark to see.
- e-h. Which entrance to the exhibit(s) can be very hard to find and similarly is/are too dark to see?
- 23 a-d. The teapot for the part(ies) should be cleaned by the maid and undoubtedly is/are dirty in the sink.
- e-h. Which teapot for the part(ies) should be cleaned by the maid and undoubtedly is/are dirty in the sink?
- 24 a-d. The check from the stockbroker(s) can be invested in good stock and usually is/are cashed at the bank.
- e-h. Which check from the stockbroker(s) can be invested in good stock and usually is/are cashed at the bank?
- 25 a-d. The gate to the pasture(s) must be leading to the campus and evidently is/are across from the park.
- e-h. Which gate to the pasture(s) must be leading to the campus and evidently is/are

- across from the park?
- 26 a-d. The anchor with the rope(s) will be left outside the boat and likely is/are left beside the dock.  
e-h. Which anchor with the rope(s) will be left outside the boat and likely is/are left beside the dock?
- 27 a-d. The advertisement on the skyscraper(s) could be difficult to read clearly and typically is/are too hard to read.  
e-h. Which advertisement on the skyscraper(s) could be difficult to read clearly and typically is/are too hard to read?
- 28 a-d. The trail for the hike(s) will be disgusting after the storm and always is/are busy during the summer.  
e-h. Which trail for the hike(s) will be disgusting after the storm and always is/are busy during the summer?
- 29 a-d. The mistake in the program(s) will be disastrous for the company and certainly is/are harmful for everyone involved.  
e-h. Which mistake in the program(s) will be disastrous for the company and certainly is/are harmful for everyone involved?
- 30 a-d. The copy of the memo(s) must be important in the case and typically is/are helpful to the lawyer.  
e-h. Which copy of the memo(s) must be important in the case and typically is/are helpful to the lawyer?
- 31 a-d. The basket for the pastr(ies) should be greasy from the chips and usually is/are sticky from the doughnuts.  
e-h. Which basket for the pastr(ies) should be greasy from the chips and usually is/are sticky from the doughnuts?
- 32 a-d. The label on the container(s) will be uninformative about the chemicals and likely is/are lacking the appropriate warning.  
e-h. Which label on the container(s) will be uninformative about the chemicals and likely is/are lacking the appropriate warning?

### **Active Filler vs. Reactivated Filler (*Experiments 3a & 3b*)**

Condition a: Singular local noun, Grammatical, Active Filler

Condition b: Singular local noun, Ungrammatical, Active Filler

Condition c: Plural local noun, Grammatical, Active Filler

Condition d: Plural local noun, Ungrammatical, Active Filler

Condition e: Singular local noun, Grammatical, Reactivated Filler

Condition f: Singular local noun, Ungrammatical, Reactivated Filler

Condition g: Plural local noun, Grammatical, Reactivated Filler

Condition h: Plural local noun, Ungrammatical, Reactivated Filler

An example of a full set of Experiment 3:

- 1 a. Which key to the cell that can be used for front doors unsurprisingly is used for two doors?  
b. Which key to the cell that can be used for front doors unsurprisingly are used for two doors?  
c. Which key to the cells that can be used for front doors unsurprisingly is used for two doors?  
d. Which key to the cells that can be used for front doors unsurprisingly are used for two doors?

- e. Which key to the cell can be used for front doors and unsurprisingly is used for two doors?
  - f. Which key to the cell can be used for front doors and unsurprisingly are used for two doors?
  - g. Which key to the cells can be used for front doors and unsurprisingly is used for two doors?
  - h. Which key to the cells can be used for front doors and unsurprisingly are used for two doors?
- 2
- a-d. Which name on the billboard(s) that must be repainted before the weekend probably is/are almost completely faded away?
  - e-h. Which name on the billboard(s) must be repainted before the weekend and probably is/are almost completely faded away?
- 3
- a-d. Which citation on the notecard(s) that might be quite difficult to follow unfortunately is/are very hard to understand?
  - e-h. Which citation on the notecard(s) might be quite difficult to follow and unfortunately is/are very hard to understand?
- 4
- a-d. Which memo from the supervisor(s) that should be about the tax return unfortunately is/are about next week's agenda?
  - e-h. Which memo from the supervisor(s) should be about the tax return and unfortunately is/are about next week's agenda?
- 5
- a-d. Which path to the monument(s) that must be covered with pretty flowers currently is/are lined with lovely trees?
  - e-h. Which path to the monument(s) must be covered with pretty flowers and currently is/are lined with lovely trees?
- 6
- a-d. Which boat to the island(s) that can be found on the shore possibly is/are docked on the lake?
  - e-h. Which boat to the island(s) can be found on the shore and possibly is/are docked on the lake?
- 7
- a-d. Which flaw in the argument(s) that will be very obvious to everyone usually is/are difficult to properly reconcile?
  - e-h. Which flaw in the argument(s) will be very obvious to everyone and usually is/are difficult to properly reconcile?
- 8
- a-d. Which door to the laborator(ies) that must be left unlocked at lunch definitely is/are locked up after nine?
  - e-h. Which door to the laborator(ies) must be left unlocked at lunch and definitely is/are locked up after nine?
- 9
- a-d. Which gift for the visitor(s) that must be bought from the store apparently is/are very expensive to buy?
  - e-h. Which gift for the visitor(s) must be bought from the store and apparently is/are very expensive to buy?
- 10
- a-d. Which message for the engineer(s) that should be available to his peers fortunately is/are very easy to access?
  - e-h. Which message for the engineer(s) should be available to his peers and fortunately is/are very easy to access?
- 11
- a-d. Which picture on the flier(s) that should be of a rural area definitely is/are of a village church?
  - e-h. Which picture on the flier(s) should be of a rural area and definitely is/are of a village church?
- 12
- a-d. Which slogan on the poster(s) that should be designed to get attention unsurprisingly is/are now boring to enjoy?
  - e-h. Which slogan on the poster(s) should be designed to get attention and unsurprisingly is/are now boring to enjoy?
- 13
- a-d. Which issue with the appliance(s) that must be solved by the company probably

- is/are reviewed by the CEO?
- e-h. Which issue with the appliance(s) must be solved by the company and probably is/are reviewed by the CEO?
- 14 a-d. Which telescope for the experiment(s) that should be stored in the lab always is/are protected in the office?
- e-h. Which telescope for the experiment(s) should be stored in the lab and always is/are protected in the office?
- 15 a-d. Which rose in the garden(s) that should be growing in the spring usually is/are wilting before the summer?
- e-h. Which rose in the garden(s) should be growing in the spring and usually is/are wilting before the summer?
- 16 a-d. Which letter from the investigator(s) that should be received in late April allegedly is/are being sent in March?
- e-h. Which letter from the investigator(s) should be received in late April and allegedly is/are being sent in March?
- 17 a-d. Which crime in the suburb(s) that must be a reflection of violence ultimately is/are a demonstration of protest?
- e-h. Which crime in the suburb(s) must be a reflection of violence and ultimately is/are a demonstration of protest?
- 18 a-d. Which poster of the band(s) that must be prominent on the wall typically is/are noticeable in the background?
- e-h. Which poster of the band(s) must be prominent on the wall and typically is/are noticeable in the background?
- 19 a-d. Which statue of the bird(s) that will be lovely in the backyard currently is/are pretty in the garden?
- e-h. Which statue of the bird(s) will be lovely in the backyard and currently is/are pretty in the garden?
- 20 a-d. Which ring with the diamond(s) that can be hidden in the closet evidently is/are in the jewelry box?
- e-h. Which ring with the diamond(s) can be hidden in the closet and evidently is/are in the jewelry box?
- 21 a-d. Which informant in the camp(s) that must be passing information to enemies regrettably is/are suspected of sending secrets?
- e-h. Which informant in the camp(s) must be passing information to enemies and regrettably is/are suspected of sending secrets?
- 22 a-d. Which entrance to the exhibit(s) that can be very hard to find similarly is/are too dark to see?
- e-h. Which entrance to the exhibit(s) can be very hard to find and similarly is/are too dark to see?
- 23 a-d. Which teapot for the part(ies) that should be cleaned by the maid undoubtedly is/are dirty in the sink?
- e-h. Which teapot for the part(ies) should be cleaned by the maid and undoubtedly is/are dirty in the sink?
- 24 a-d. Which check from the stockbroker(s) that can be invested in good stock usually is/are cashed at the bank?
- e-h. Which check from the stockbroker(s) can be invested in good stock and usually is/are cashed at the bank?
- 25 a-d. Which gate to the pasture(s) that must be leading to the campus evidently is/are across from the park?
- e-h. Which gate to the pasture(s) must be leading to the campus and evidently is/are across from the park?
- 26 a-d. Which anchor with the rope(s) that will be left outside the boat likely is/are left beside the dock?
- e-h. Which anchor with the rope(s) will be left outside the boat and likely is/are left

- beside the dock?
- 27 a-d. Which advertisement on the skyscraper(s) that could be difficult to read clearly typically is/are too hard to read?  
e-h. Which advertisement on the skyscraper(s) could be difficult to read clearly and typically is/are too hard to read?
- 28 a-d. Which trail for the hike(s) that will be disgusting after the storm always is/are busy during the summer?  
e-h. Which trail for the hike(s) will be disgusting after the storm and always is/are busy during the summer?
- 29 a-d. Which mistake in the program(s) that will be disastrous for the company certainly is/are harmful for everyone involved?  
e-h. Which mistake in the program(s) will be disastrous for the company and certainly is/are harmful for everyone involved?
- 30 a-d. Which copy of the memo(s) that must be important in the case typically is/are helpful to the lawyer?  
e-h. Which copy of the memo(s) must be important in the case and typically is/are helpful to the lawyer?
- 31 a-d. Which basket for the pastr(ies) that should be greasy from the chips usually is/are sticky from the doughnuts?  
e-h. Which basket for the pastr(ies) should be greasy from the chips and usually is/are sticky from the doughnuts?
- 32 a-d. Which label on the container(s) that will be uninformative about the chemicals likely is/are lacking the appropriate warning?  
e-h. Which label on the container(s) will be uninformative about the chemicals and likely is/are lacking the appropriate warning?
